# Supplementary material for: Human fascioliasis endemic areas in Argentina: multigene characterisation of the lymnaeid vectors and climatic-environmental assessment of the transmission pattern
Source: PubMed Central journal article supplement (PMC4882814; doi:10.1186/s13071-016-1589-z), 2016-05-27

## Additional file 2: Supplementary Fig. S1

Freshwater habitats of lymnaeids. **a-g** Locality A: in villages of Taton and Rio Grande; **h-j** Locality B: in the neighbourhood of Ipizca. **b** Note general aridity. **c** Sand dunes in the background. **b, d** Closeness to human dwellings. **g** Lymnaeids present on mud. **i** Small artificial dyke on the river.

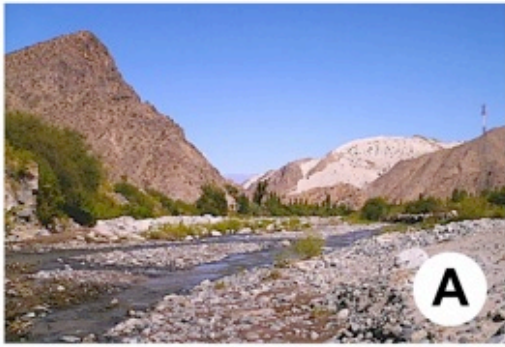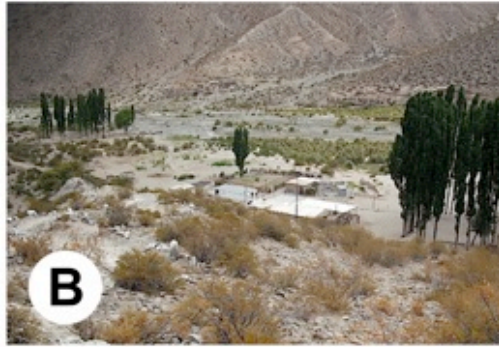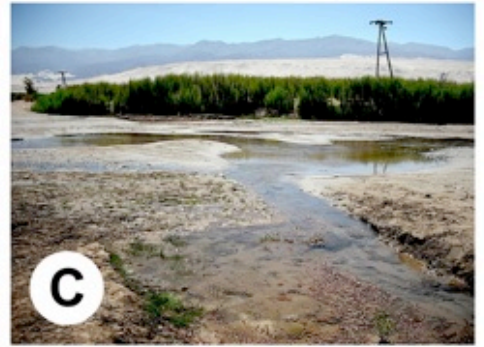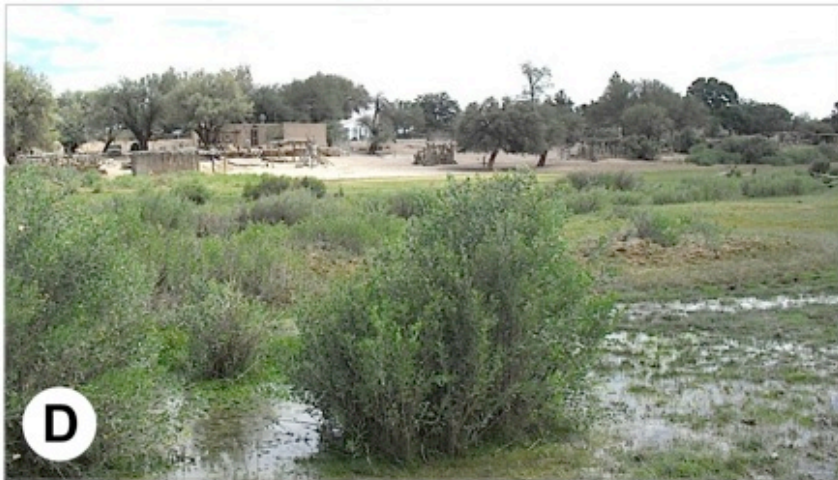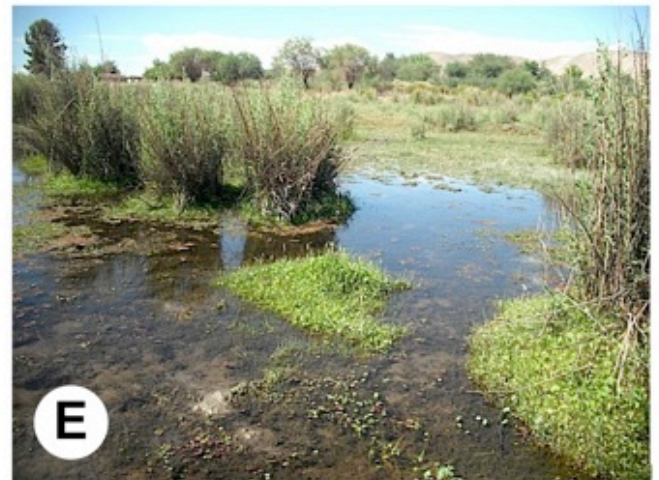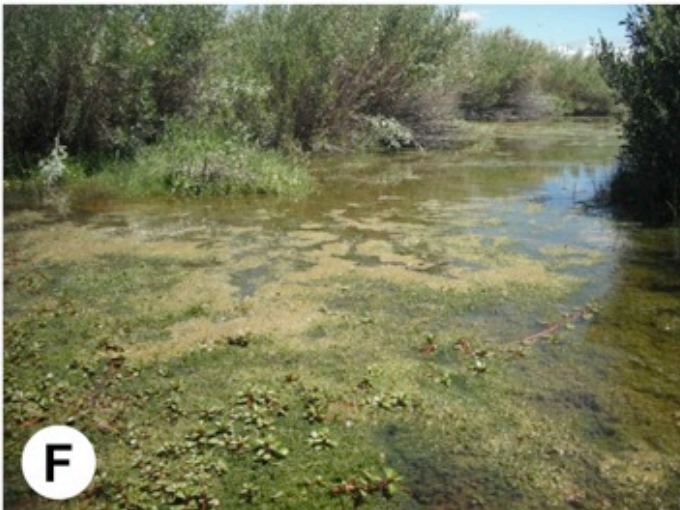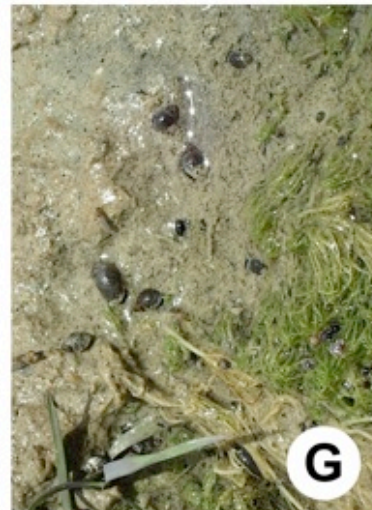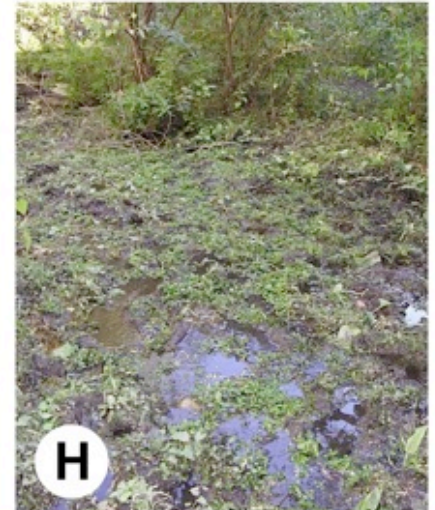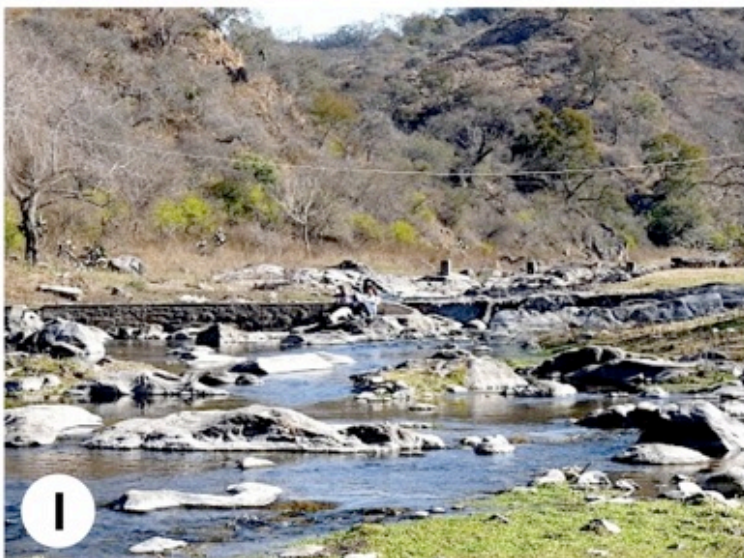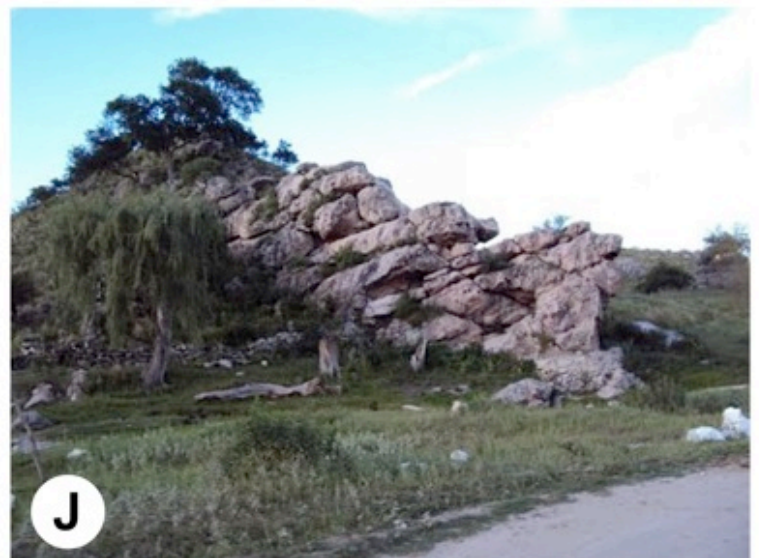

Supplement: 13071_2016_1589_MOESM2_ESM.pdf [file 13071_2016_1589_MOESM2_ESM.pdf]
